# Supplementary material
Source: Royal Society of Chemistry journal article supplement (doi:10.1039/d6nr00309e)
Supplement: d6nr00309e1.pdf [file d6nr00309e1.pdf]

## Supplementary Information

### Iron-Induced Phase Engineering for High Color-Purity Blue LEDs in Perovskites

Youngchae Cho,<sup>1,a</sup> Sang Wook Park,<sup>1,a</sup> Seungmin Baek,<sup>1,a</sup> Donghwan Yun,<sup>a</sup> Gwang Yong Shin,<sup>a</sup> Hyeonsu Son,<sup>b,c</sup> Seyeong Song,<sup>d</sup> Hye Won Cho,<sup>e</sup> Hyeseon Shin,<sup>a</sup> Tae Kyung Lee <sup>\*b,c</sup> and Gi-Hwan Kim <sup>\*a,d,e</sup>

<sup>a</sup>Department of Materials Engineering and Convergence Technology, Gyeongsang National University (GNU), 501 Jinju-daero, Jinju 52828, Republic of Korea

<sup>b</sup>Department of Organic and Nano Engineering, Hanyang University, 222 Wangsimni-ro, Seongdong-gu, Seoul 04763, Republic of Korea

<sup>c</sup>Human-Tech Convergence Program, Hanyang University, 222 Wangsimni-ro, Seongdong-gu, Seoul 04763, Republic of Korea

<sup>d</sup>Research Institute of Molecular Alchemy, Gyeongsang National University (GNU), 501 Jinju-daero, Jinju 52828, Republic of Korea

<sup>e</sup>College of Space and Aeronautics, Gyeongsang National University (GNU), 501 Jinju-daero, Jinju 52828, Republic of Korea

<sup>1</sup>Y. Cho, S. W. Park, and S. Baek contributed equally to this work.

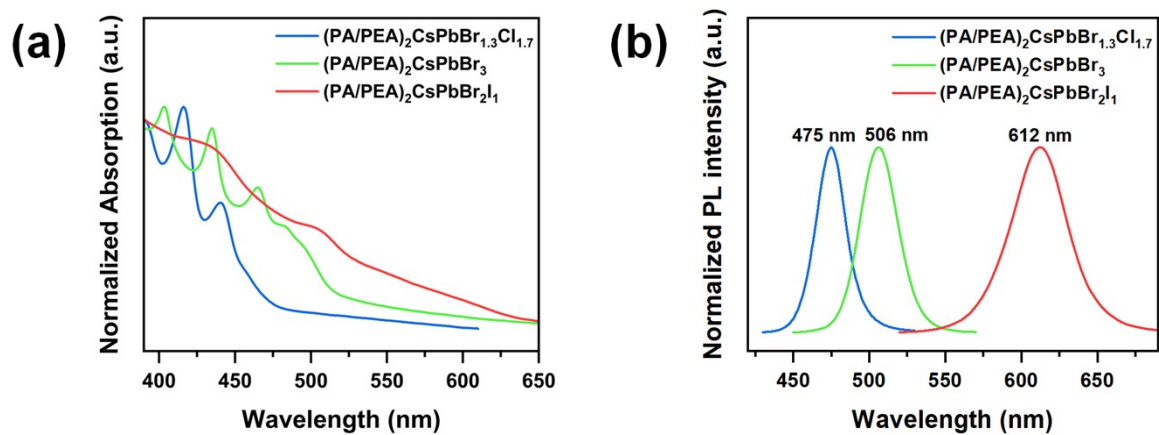

**Fig. S1** Optical characteristics of pristine quasi-2D perovskite. (a) UV-visible absorption spectra. (b) Photoluminescence spectra.

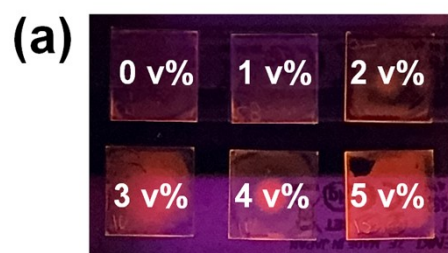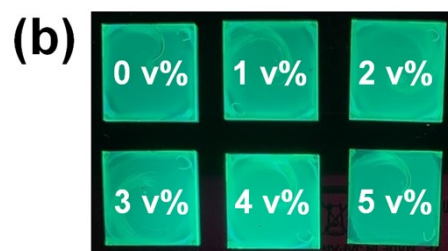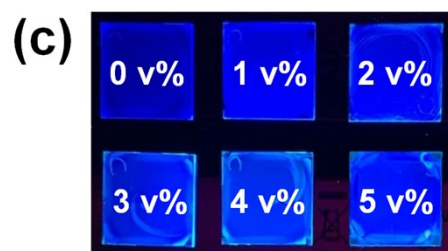

**Fig. S2** Photoluminescence images of perovskite films prepared with iron additive concentrations (0–5 v%) under UV lamp illumination. (a) Red films. (b) Green films. (c) Blue films.

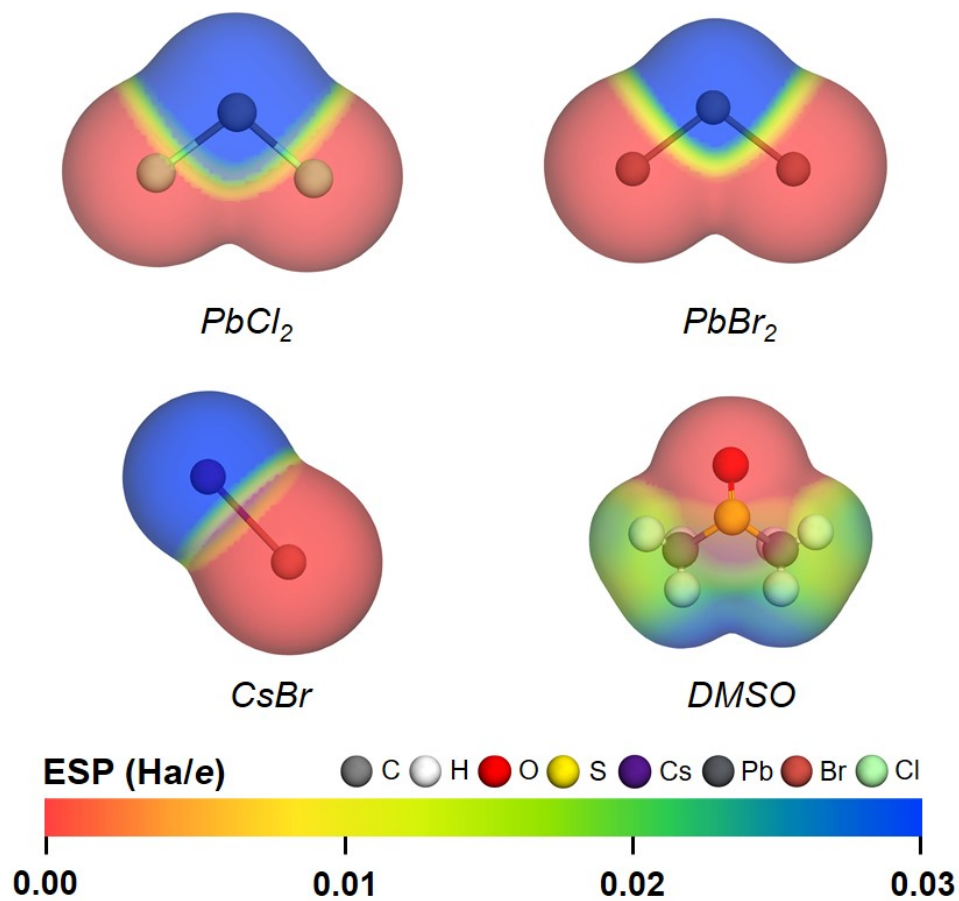

**Fig. S3** Electrostatic potential (ESP) isosurfaces of  $PbCl_2$ ,  $PbBr_2$ ,  $CsBr$ , and  $DMSO$  molecules. The isosurface value is  $0.03 e/\text{\AA}^3$ .

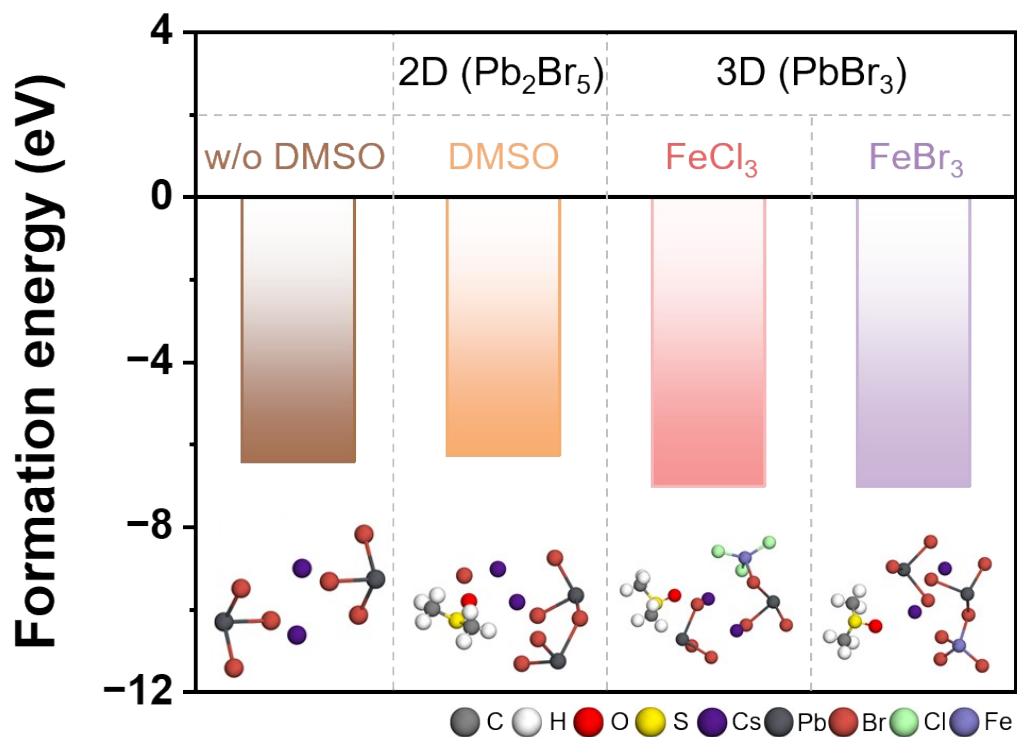

**Fig. S4** Optimized structures and formation energies of 2D (Pb<sub>2</sub>Br<sub>5</sub>-based) and 3D (PbBr<sub>3</sub>-based) structures in the green perovskite precursor system under different conditions (*i.e.*, w/o DMSO, DMSO, FeCl<sub>3</sub>, and FeBr<sub>3</sub>).

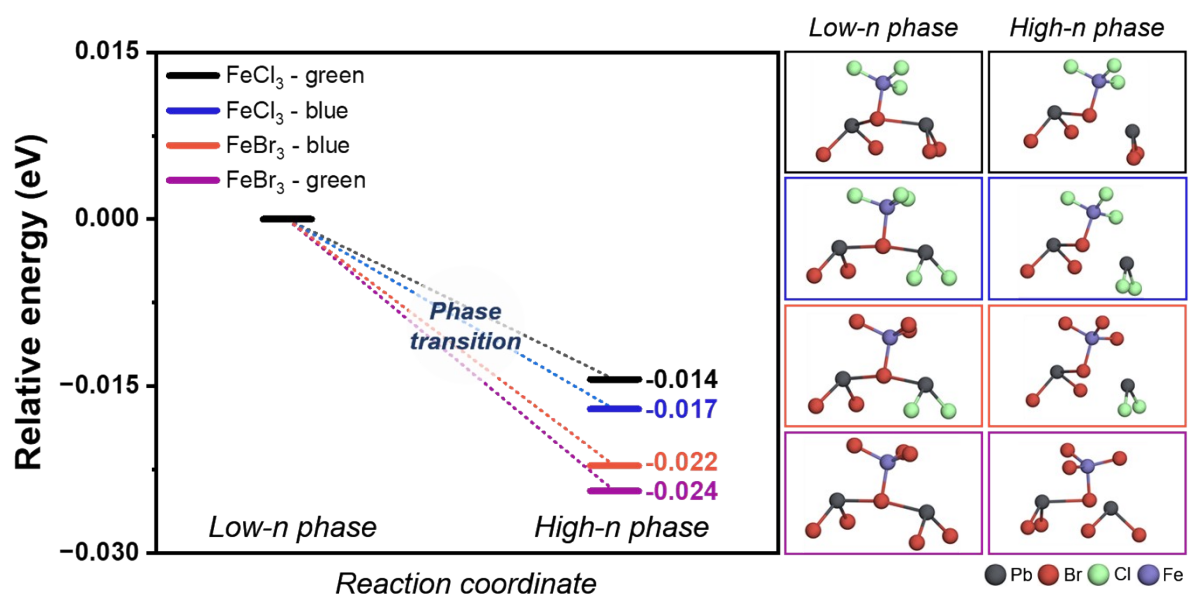

**Fig. S5** Relative energy profiles of phase transition from low-n phases to high-n phases induced by iron additives in green and blue precursor systems.

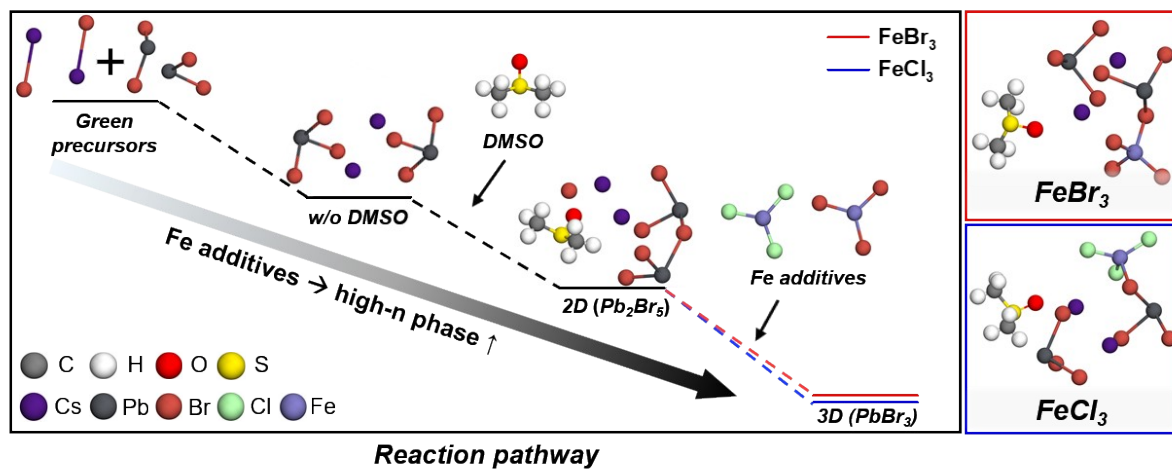

**Fig. S6** Schematic reaction pathway of the phase transition from  $Pb_2Br_5$  to  $PbBr_3$  in the green precursor system.

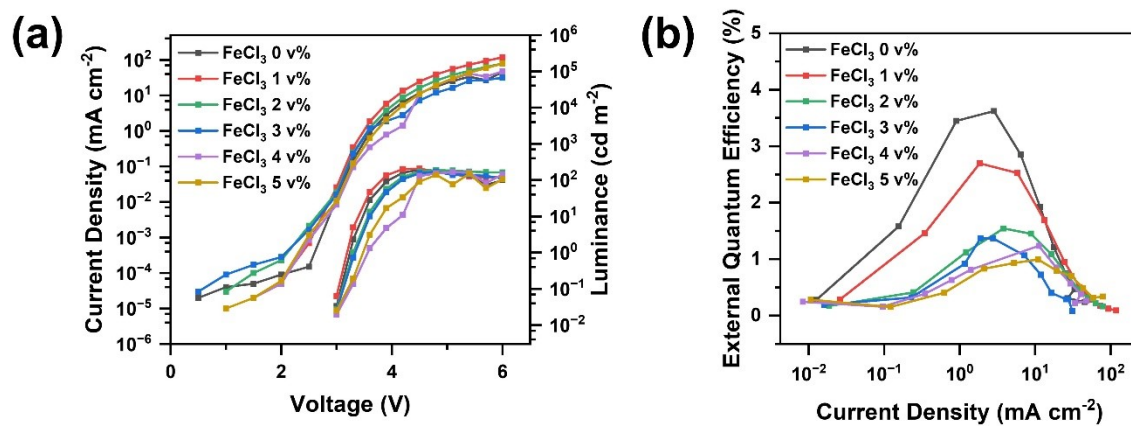

**Fig. S7** Characteristics of blue PeLEDs with initial concentration of FeCl<sub>3</sub> additives. (a) *J-V-L* curves, (b) EQE-*J* curves.

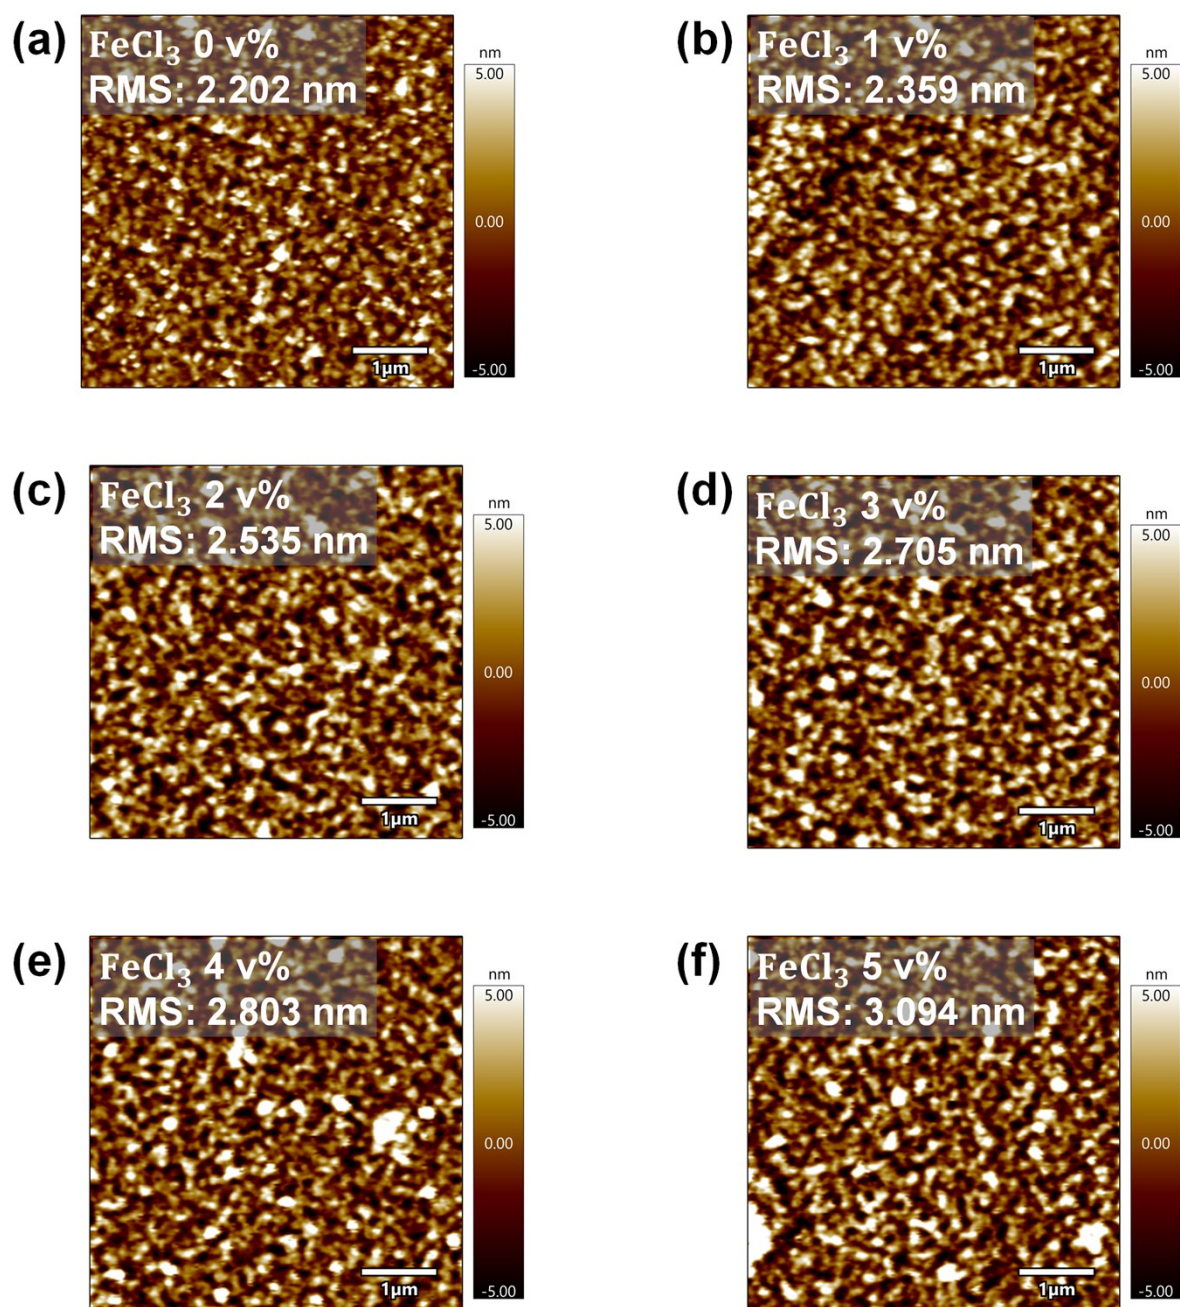

**Fig. S8** AFM topography images of quasi-2D perovskite films with initial concentration of  $\text{FeCl}_3$  additives: (a) 0 v%, (b) 1 v%, (c) 2 v%, (d) 3 v%, (e) 4 v%, and (f) 5 v%.

**(a) FeCl<sub>3</sub> 0 v%**

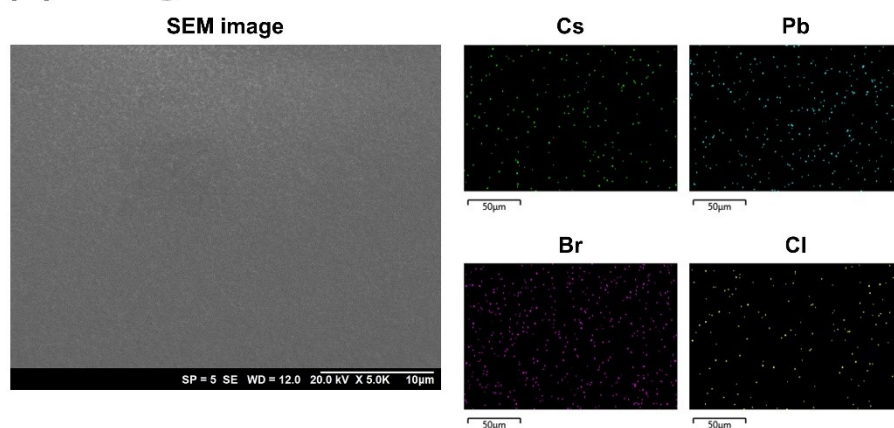

**(b) FeCl<sub>3</sub> 5 v%**

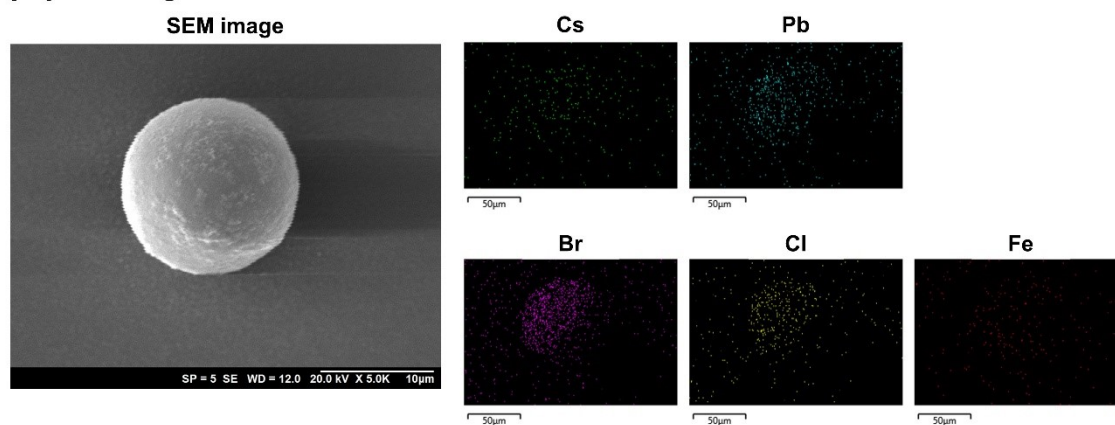

**Fig. S9** SEM images and corresponding EDS elemental mapping of quasi-2D perovskite films with initial concentration of FeCl<sub>3</sub> additives: (a) 0 v% and (b) 5 v%.

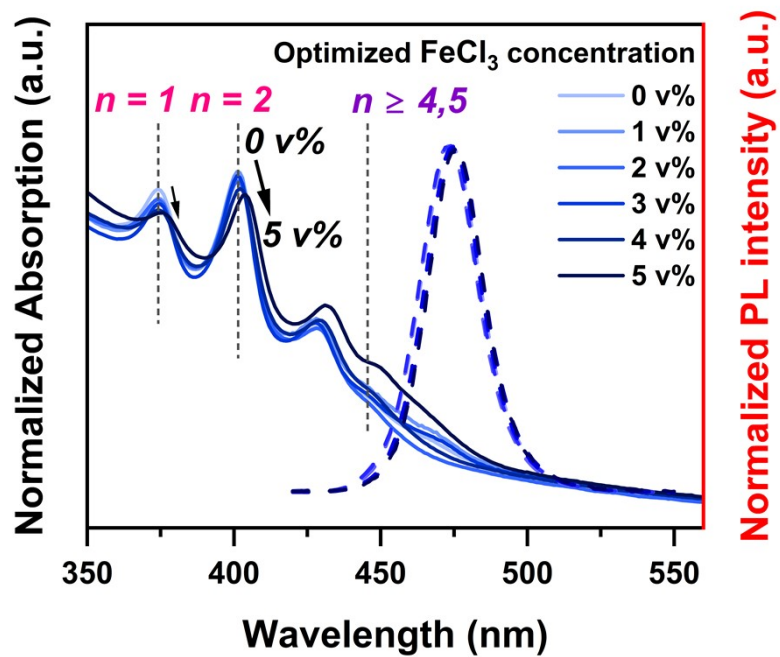

**Fig. S10** UV-visible absorption and photoluminescence spectra of blue emission perovskite with optimized concentration of FeCl<sub>3</sub> additives.

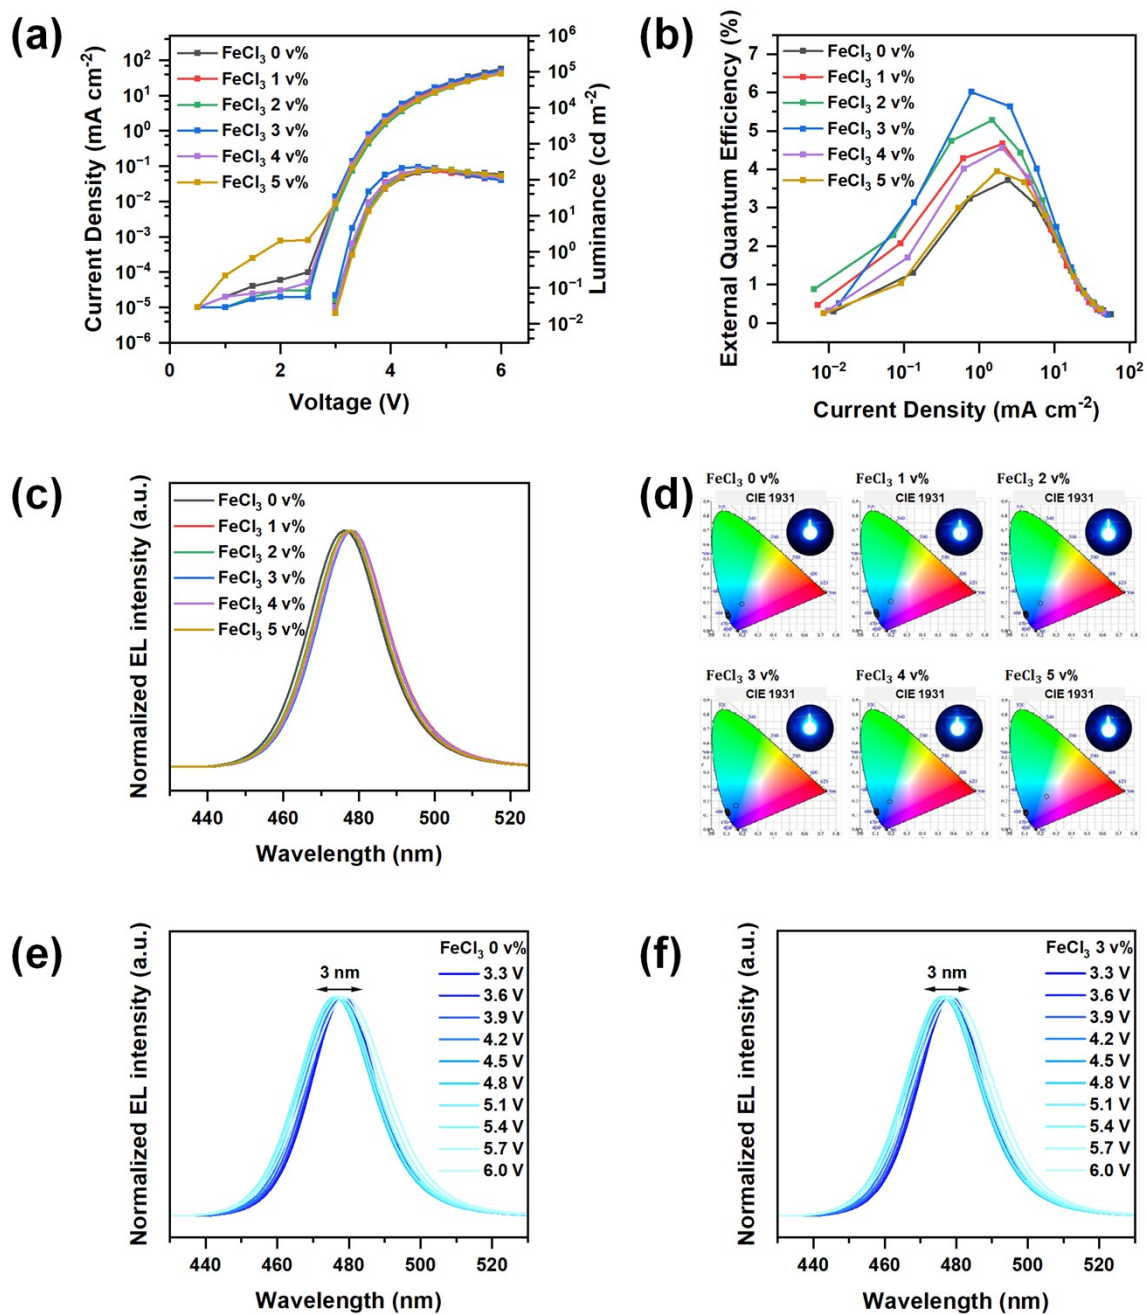

**Fig. S11** Characteristics of blue PeLEDs with optimized concentration of FeCl<sub>3</sub> additives. (a)  $J-V-L$  curves, (b) EQE- $J$  curves, (c) electroluminescence spectra, and (d) CIE coordinates of the blue PeLEDs (inset shows a photograph of an operating PeLEDs). Electroluminescence spectra according to the applied voltages of (e) FeCl<sub>3</sub> 0 v% and (f) FeCl<sub>3</sub> 3 v%.

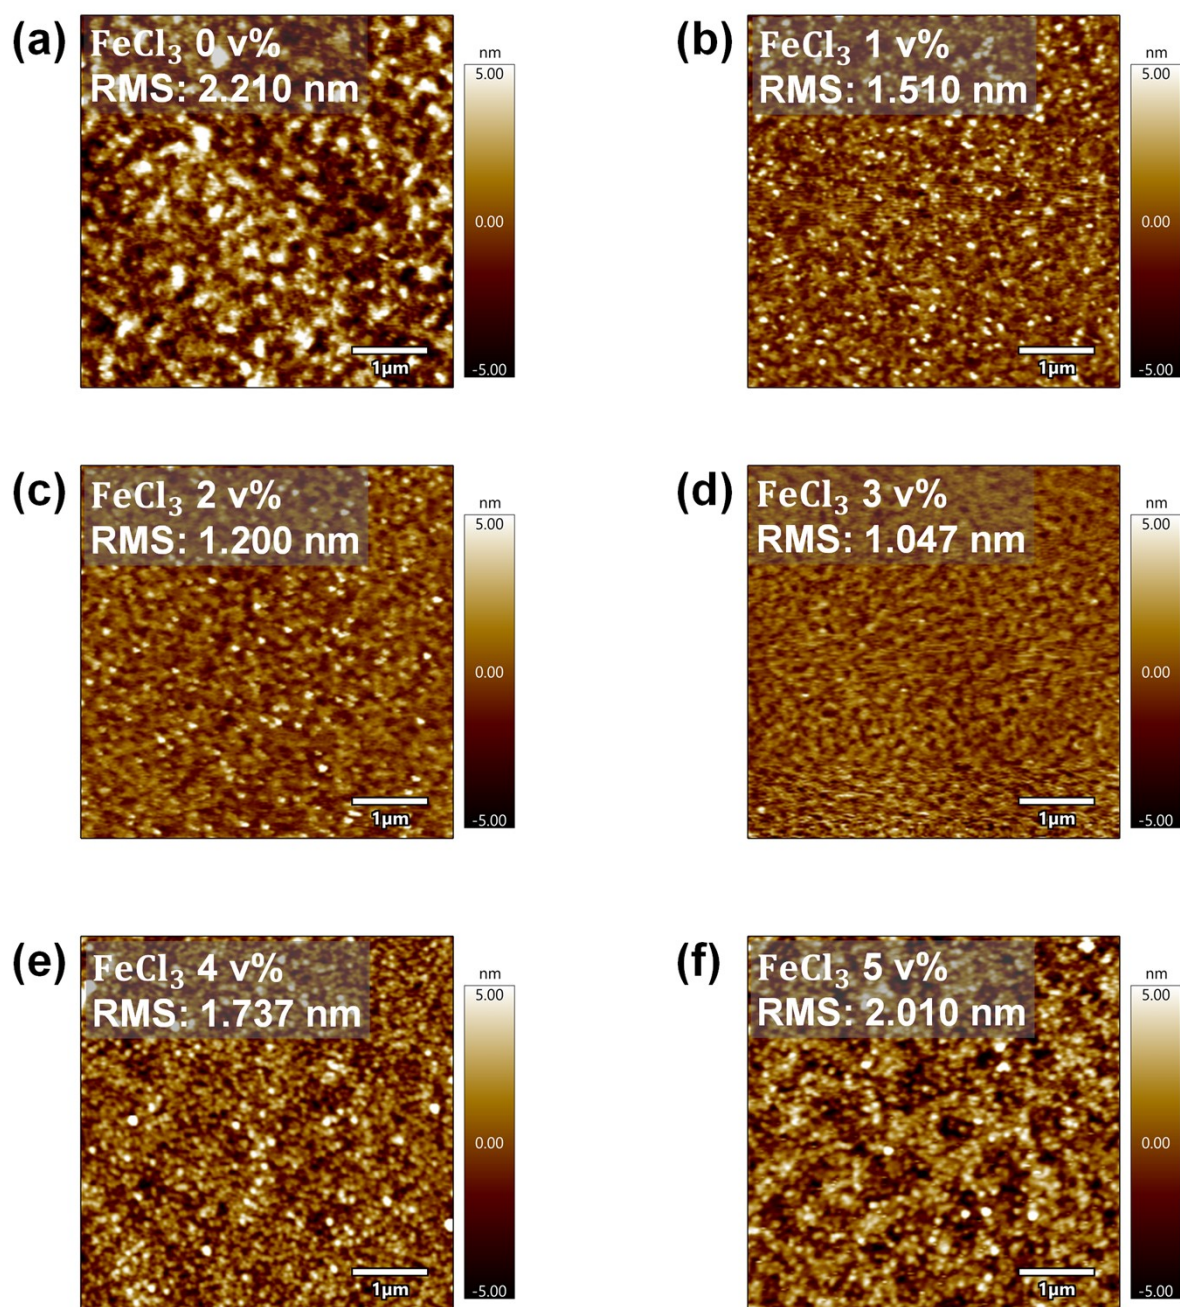

**Fig. S12** AFM topography images of quasi-2D perovskite films with optimized concentration of  $\text{FeCl}_3$  additives: (a) 0 v%, (b) 1 v%, (c) 2 v%, (d) 3 v%, (e) 4 v%, and (f) 5 v%.

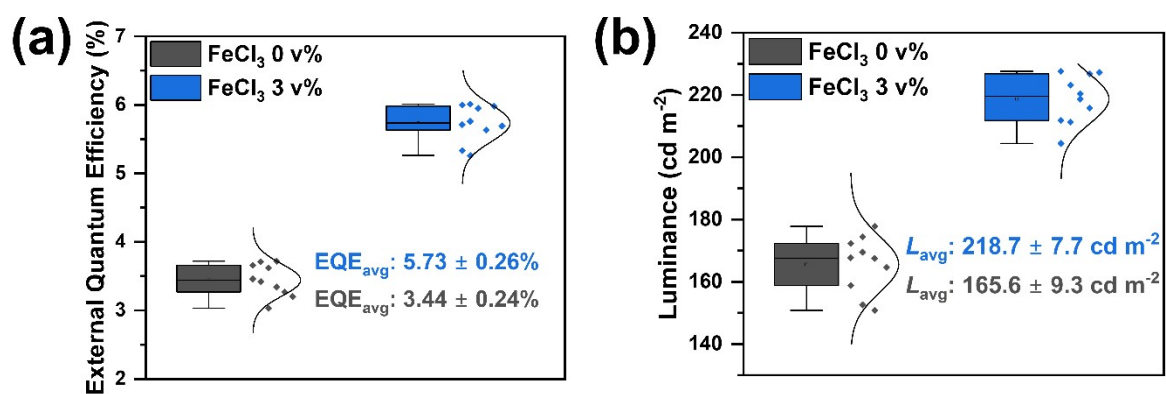

**Fig. S13** Average values and standard deviations (a) EQE and (b) luminance for 10 devices.

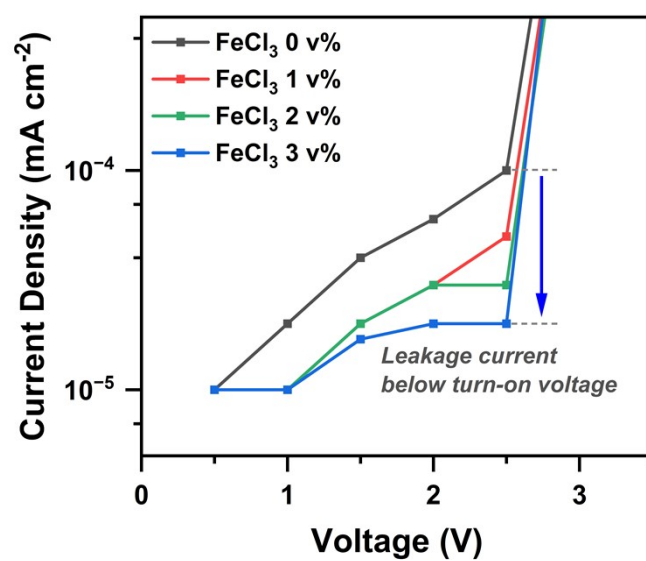

**Fig. S14** Enlarged J–V curves below the turn-on voltage showing reduced leakage current with increasing FeCl<sub>3</sub> concentration.

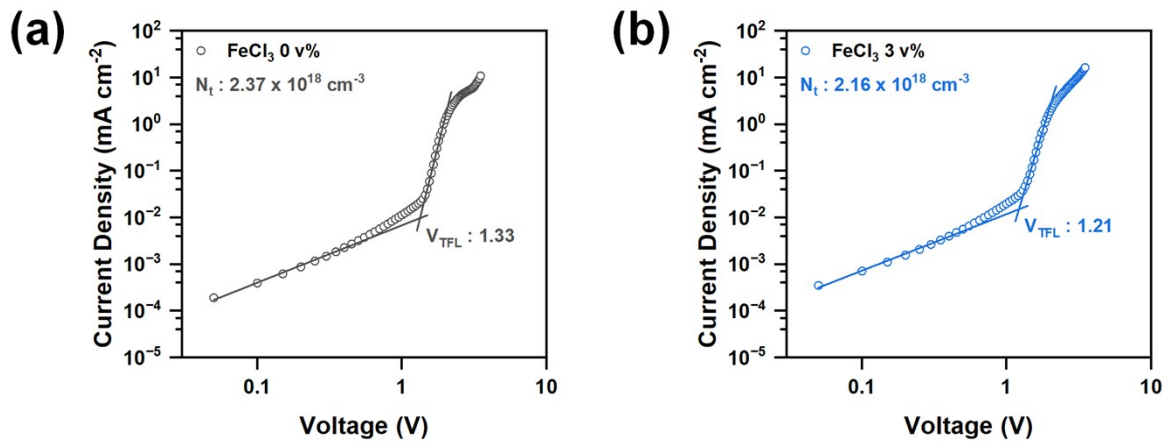

**Fig. S15** The space-charge-limited current (SCLC) of quasi-2D perovskite hole-only devices of (a)  $\text{FeCl}_3$  0 v% and (b)  $\text{FeCl}_3$  3 v%.

**Table S1.** Photoluminescence wavelength and FWHM of quasi-2D perovskite with additives.

| Additive<br>volume<br>ratios | Red + FeBr <sub>3</sub> |              | Green + FeBr <sub>3</sub> |              | Blue + FeCl <sub>3</sub> |              |
|------------------------------|-------------------------|--------------|---------------------------|--------------|--------------------------|--------------|
|                              | Wavelength<br>(nm)      | FWHM<br>(nm) | Wavelength<br>(nm)        | FWHM<br>(nm) | Wavelength<br>(nm)       | FWHM<br>(nm) |
| 0 v%                         | 612                     | 43.7         | 506                       | 30.8         | 475                      | 28.0         |
| 1 v%                         | 612                     | 42.8         | 506                       | 26.7         | 476                      | 27.3         |
| 2 v%                         | 613                     | 41.8         | 508                       | 26.0         | 479                      | 26.6         |
| 3 v%                         | 615                     | 41.3         | 509                       | 23.8         | 480                      | 26.2         |
| 4 v%                         | 617                     | 40.2         | 509                       | 23.3         | 480                      | 25.9         |
| 5 v%                         | 621                     | 39.6         | 510                       | 22.5         | 481                      | 25.8         |

**Table S2.** Device characteristics of blue PeLEDs with initial concentration of FeCl<sub>3</sub> additives.

| Additive concentrations | Turn on voltage (V) | Luminance max (cd/m <sup>2</sup> ) @ voltage (V) | EQE max (%) @ voltage (V) | EL peak (nm) |
|-------------------------|---------------------|--------------------------------------------------|---------------------------|--------------|
| 0 v%                    | 3.3                 | 192.1 @ 4.5                                      | 3.62 @ 3.9                | 476          |
| 1 v%                    | 3.3                 | 205.0 @ 4.5                                      | 2.70 @ 3.6                | 479          |
| 2 v%                    | 3.3                 | 188.5 @ 4.8                                      | 1.54 @ 3.9                | 479          |
| 3 v%                    | 3.3                 | 170.5 @ 4.8                                      | 1.37 @ 3.9                | 479          |
| 4 v%                    | 3.3                 | 164.1 @ 5.1                                      | 1.24 @ 4.5                | 480          |
| 5 v%                    | 3.3                 | 149.0 @ 5.4                                      | 1.00 @ 4.5                | 480          |

**Table S3.** Photoluminescence wavelength and FWHM of quasi-2D perovskite with optimized concentration of FeCl<sub>3</sub> additives.

| Additive<br>volume ratios | Blue + FeCl <sub>3</sub> |              |
|---------------------------|--------------------------|--------------|
|                           | Wavelength<br>(nm)       | FWHM<br>(nm) |
| 0 v%                      | 474                      | 23.8         |
| 1 v%                      | 474                      | 23.8         |
| 2 v%                      | 474                      | 23.6         |
| 3 v%                      | 475                      | 22.9         |
| 4 v%                      | 476                      | 22.6         |
| 5 v%                      | 476                      | 22.2         |

**Table S4.** Device characteristics of blue PeLEDs with optimized concentration of FeCl<sub>3</sub> additives.

| Additive concentrations | Turn on voltage (V) | Luminance max (cd/m <sup>2</sup> ) @ voltage (V) | EQE max (%) @ voltage (V) | EL peak (nm) |
|-------------------------|---------------------|--------------------------------------------------|---------------------------|--------------|
| 0 v%                    | 3.3                 | 177.8 @ 4.8                                      | 3.72 @ 3.9                | 476          |
| 1 v%                    | 3.3                 | 182.1 @ 4.5                                      | 4.67 @ 3.9                | 477          |
| 2 v%                    | 3.3                 | 194.4 @ 4.8                                      | 5.28 @ 3.9                | 477          |
| 3 v%                    | 3.3                 | 227.6 @ 4.5                                      | 6.01 @ 3.6                | 478          |
| 4 v%                    | 3.3                 | 192.5 @ 4.8                                      | 4.56 @ 3.9                | 478          |
| 5 v%                    | 3.3                 | 189.3 @ 4.8                                      | 3.95 @ 3.9                | 478          |

**Table S5.** Electroluminescence wavelength and FWHM of quasi-2D perovskite LEDs with additives.

| Additive<br>volume ratios | Blue + FeCl <sub>3</sub> |                 |
|---------------------------|--------------------------|-----------------|
|                           | EL Wavelength<br>(nm)    | EL FWHM<br>(nm) |
| 0 v%                      | 476                      | 23.2            |
| 1 v%                      | 477                      | 22.8            |
| 2 v%                      | 477                      | 22.5            |
| 3 v%                      | 478                      | 22.2            |
| 4 v%                      | 478                      | 22.2            |
| 5 v%                      | 478                      | 21.8            |

**Table S6.** Triexponential fitting parameters for PL lifetimes of blue-emitting quasi-2D perovskite films with FeCl<sub>3</sub> additives.

| Additive concentrations | $\tau_1$ (ns) | $f_1$ (%) | $\tau_2$ (ns) | $f_2$ (%) | $\tau_3$ (ns) | $f_3$ (%) | $\tau_{\text{avg}}$ (ns) | $\chi^2$ |
|-------------------------|---------------|-----------|---------------|-----------|---------------|-----------|--------------------------|----------|
| 0 v%                    | 0.79          | 46.53     | 7.93          | 33.16     | 60.81         | 20.31     | 1.57                     | 1.35     |
| 3 v%                    | 2.26          | 40.25     | 13.22         | 42.63     | 84.97         | 17.11     | 4.71                     | 1.44     |
